# Supplementary material
Source: ML conference proceedings conference paper supplement (https://openreview.net/forum?id=i-qlDABvDo)
Supplement: supplementary_material [file attachment]

Test results for:  $\Pi_{CDP}$

|  |  |     |  |
|--|--|-----|--|
|  |  | ... |  |
|--|--|-----|--|

Test case  
weights

$\hat{\sigma}_{\tau^*}^*$

$\tau^*$

Test cases

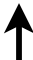

|  |  |     |  |
|--|--|-----|--|
|  |  | ... |  |
|  |  | ... |  |
|  |  | ... |  |

$c_1$

$c_2$

$c_3$

$\pi_1$

$\pi_2$

...

$\pi_{|\Pi_{CDP}|}$

Candidate deployment policies  $\Pi_{CDP}$
