# Supplementary material
Source: ML conference proceedings conference paper supplement (https://openreview.net/forum?id=i-qlDABvDo)

## Hyperparameters

- $k, N$  Robustness parameters
- $\ell$  Loss function
- $T$  Number optimization rounds
- $m = 3$  Number test cases to select

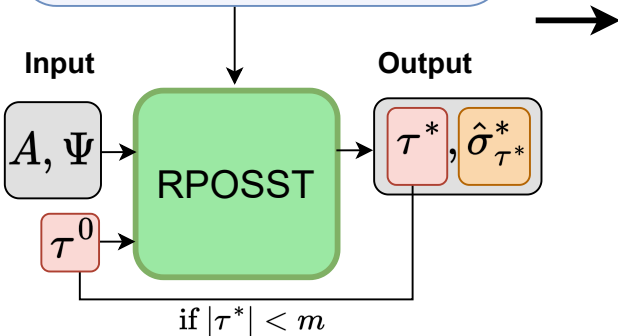

Supplement: supplementary_material [file attachment]
