# Supplementary material
Source: ML conference proceedings conference paper supplement (https://openreview.net/forum?id=i-qlDABvDo)
Supplement: supplementary_material [file attachment]

**Result matrix:  $A$**

Diagram illustrating the TNP framework:

- Test case pool  $\mathcal{T}$ :** A vertical red box containing test cases  $c_1, c_2, \dots, c_{|\mathcal{T}|}$ .
- Matrix:** A large square matrix representing the evaluation results. The first row is highlighted in light blue and contains the value  $A_{1, \pi_1}$  in the first column, followed by an ellipsis. The matrix is partitioned into four quadrants by a horizontal and vertical line.
- Tuning policies  $\Pi_{TNP}$ :** A horizontal blue box containing policies  $\pi_1, \pi_2, \dots, \pi_{|\Pi_{TNP}|}$ .
- Arrow:** A black arrow pointing from the matrix to the right.

# C1

# C<sub>2</sub>

...

$$\mathbf{C}_{|\mathcal{T}|}$$
$$A_{1,\pi_1}$$

■ ■ ■

- 
- 
- 
- 
- 
- 
- 

■ ■ ■

 $\pi_1$  $\pi_2$ 

///

 $\pi$  $\Pi_{TNP}$ 

## Tuning policies $\Pi_{TNP}$
