# Supplementary material (part 3 of 3)
Source: ML conference proceedings conference paper supplement (https://openreview.net/forum?id=i-qlDABvDo)

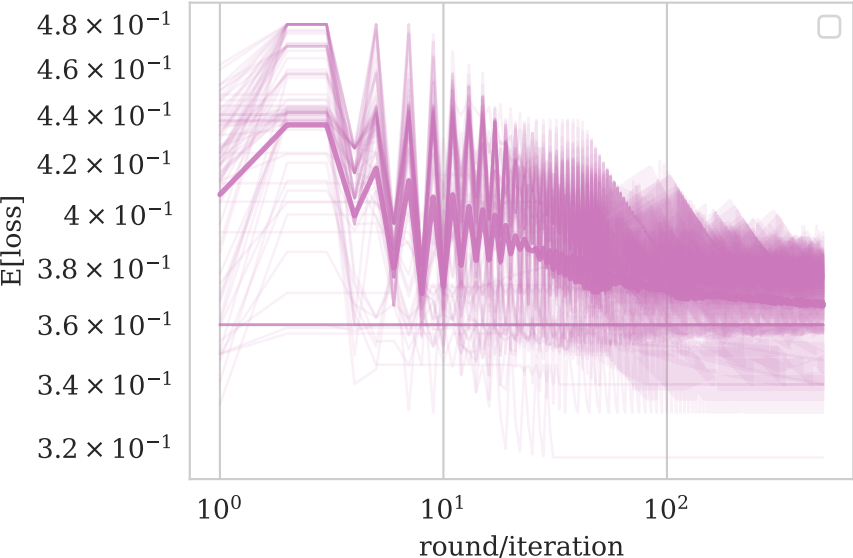

Supplement: supplementary_material [file attachment]
